# Supplementary material for: A rapid, multiplexed kinase activity assay using 8-plex iTRAQ labeling, SPE, and MALDI-TOF/TOF MS
Source: Royal Society of Chemistry journal article supplement (doi:10.1039/c9an01810g), 2019-11-28
Supplement: c9an01810g1.xlsx [file c9an01810g1.xlsx]

## Sheet: 工作表1
Protein ID	Peptide	-10lgP	Mass	Length	ppm	m/z	z	RT	Start	End	PTM
PS1	P.RAAT(+79.97)FPFR	69.66	1044.49	8	-35.9	523.234	2	21.2	3	10	Phosphorylation (STY)
PS1	RPRAAT(+79.97)FPF.R	43.06	1141.54	9	-47.2	571.752	2	23.38	1	9	Phosphorylation (STY)
PS1	RPRAAT(+79.97)FPFR	50.38	1297.64	10	-32.2	433.541	3	18.53	1	10	Phosphorylation (STY)
PS2	PRPRLNTS(+79.97)DFQK	47.28	1537.74	12	-25.9	769.857	2	14.79	1	12	Phosphorylation (STY)
PS2	PRPRLNT(+79.97)SDFQK	59.2	1537.74	12	-25.9	769.857	2	14.87	1	12	Phosphorylation (STY)
PS3	RIRTQSFS(+79.97)LQ.E	33.9	1314.64	10	-37.7	658.305	2	19.74	1	10	Phosphorylation (STY)
PS3	R.IRT(+79.97)QSFSLQE.R	38.43	1287.59	10	-45.3	644.771	2	23.82	2	11	Phosphorylation (STY)
PS3	I.RTQSFS(+79.97)LQER	40.06	1330.6	10	-30.5	666.288	2	17.52	3	12	Phosphorylation (STY)
PS3	RIRT(+79.97)QSFSLQ.E	44.74	1314.64	10	-27	658.312	2	20.57	1	10	Phosphorylation (STY)
PS3	R.IRTQS(+79.97)FSLQE.R	56.02	1287.59	10	-42.3	644.773	2	23.89	2	11	Phosphorylation (STY)
PS3	RIRTQS(+79.97)FSLQ.E	62.57	1314.64	10	-25.5	658.313	2	19.87	1	10	Phosphorylation (STY)
PS3	I.RT(+79.97)QSFSLQER	64.49	1330.6	10	-43	666.28	2	17.58	3	12	Phosphorylation (STY)
PS3	I.RTQS(+79.97)FSLQER	83.36	1330.6	10	-34.4	666.286	2	17.64	3	12	Phosphorylation (STY)
PS3	R.IRT(+79.97)QSFSLQER	37.36	1443.69	11	-44.7	722.818	2	20.14	2	12	Phosphorylation (STY)
PS3	RIRT(+79.97)QSFSLQE.R	39.01	1443.69	11	-44	722.819	2	21.64	1	11	Phosphorylation (STY)
PS3	RIRTQS(+79.97)FSLQE.R	39.6	1443.69	11	-32.1	722.828	2	20.28	1	11	Phosphorylation (STY)
PS3	RIRTQSFS(+79.97)LQE.R	41.23	1443.69	11	-34.7	722.826	2	20.21	1	11	Phosphorylation (STY)
PS3	R.IRTQS(+79.97)FSLQER	76.99	1443.69	11	-48.6	722.816	2	19.99	2	12	Phosphorylation (STY)
PS3	RIRTQSFS(+79.97)LQER	58.64	1599.79	12	-40.4	534.249	3	16.92	1	12	Phosphorylation (STY)
PS3	RIRT(+79.97)QSFSLQER	61.03	1599.79	12	-38.3	534.25	3	17.13	1	12	Phosphorylation (STY)
PS3	RIRTQS(+79.97)FSLQER	70.07	1599.79	12	-43	534.247	3	17.77	1	12	Phosphorylation (STY)
PS4	K.RLIS(+79.97)SVEDPFR	76.85	1397.67	11	-44.9	699.811	2	27.48	3	13	Phosphorylation (STY)
PS4	R.KRLIS(+79.97)SVEDPFR	34.61	1525.77	12	-40.1	763.859	2	25.22	2	13	Phosphorylation (STY)
PS4	RKRLISS(+79.97)VEDPF.R	42.7	1525.77	12	-18	763.876	2	24.85	1	12	Phosphorylation (STY)
PS4	RKRLIS(+79.97)SVEDPF.R	70.96	1525.77	12	-25.8	763.87	2	24.96	1	12	Phosphorylation (STY)
PS4	RKRLISS(+79.97)VEDPFR	38.45	1681.87	13	-32.5	841.913	2	22.3	1	13	Phosphorylation (STY)
PS4	RKRLIS(+79.97)SVEDPFR	86.39	1681.87	13	-43.8	561.605	3	22.28	1	13	Phosphorylation (STY)
PS5	E.LQDDY(+79.97)EDLLPFR	42.6	1602.7	12	-26.6	802.334	2	33.78	2	13	Phosphorylation (STY)
PS5	ELQDDY(+79.97)EDLLPFR	77.59	1731.74	13	-27.3	866.853	2	34.33	1	13	Phosphorylation (STY)
PS6	S.RTESIT(+79.97)ATSPFR	30.35	1444.67	12	-41.8	723.313	2	29.76	6	17	Phosphorylation (STY)
PS6	R.S(+79.97)RTESITATSPF.R	33.53	1375.6	12	-44.2	688.778	2	25.22	5	16	Phosphorylation (STY)
PS6	L.T(+79.97)RRSRT(+79.97)ESITAT.S	38.64	1537.66	12	7.3	769.845	2	32.57	2	13	Phosphorylation (STY)
PS6	R.SRT(+79.97)ESITATSPF.R	41.05	1375.6	12	-43.6	688.778	2	25.19	5	16	Phosphorylation (STY)
PS6	R.SRTES(+79.97)ITATSPF.R	47.16	1375.6	12	-48.6	688.775	2	25.14	5	16	Phosphorylation (STY)
PS6	S.RT(+79.97)ESITATSPFR	61.83	1444.67	12	-37.6	723.316	2	20.63	6	17	Phosphorylation (STY)
PS6	S.RTES(+79.97)ITATSPFR	65.5	1444.67	12	-33.2	723.319	2	20.65	6	17	Phosphorylation (STY)
PS6	R.SRTESIT(+79.97)ATSPFR	35.67	1531.7	13	-28.9	766.837	2	20.7	5	17	Phosphorylation (STY)
PS6	R.S(+79.97)RTESITATSPFR	65.99	1531.7	13	-38.9	766.829	2	20.69	5	17	Phosphorylation (STY)
PS6	R.SRT(+79.97)ESITATSPFR	89.43	1531.7	13	-32	511.559	3	20.68	5	17	Phosphorylation (STY)
PS6	R.SRTES(+79.97)ITATSPFR	97.19	1531.7	13	-34.3	511.558	3	20.65	5	17	Phosphorylation (STY)
PS6	R.RSRT(+79.97)ESITATSPFR	59.27	1687.8	14	-38.4	563.587	3	18.21	4	17	Phosphorylation (STY)
PS6	R.RS(+79.97)RTESITATSPFR	59.35	1687.8	14	-41.2	563.586	3	18.19	4	17	Phosphorylation (STY)
PS6	R.RSRTES(+79.97)ITATSPFR	72.12	1687.8	14	-44.6	563.584	3	18.11	4	17	Phosphorylation (STY)
PS7	HFPQFSYSAS(+79.97)G	31.81	1306.5	11	-29.7	654.239	2	27.06	1	11	Phosphorylation (STY)
PS7	HFPQFSY(+79.97)SASG	39.5	1306.5	11	-42.4	654.231	2	27.42	1	11	Phosphorylation (STY)
PS7	HFPQFSYS(+79.97)ASG	48.42	1306.5	11	-42.1	654.231	2	26.56	1	11	Phosphorylation (STY)
PS7	HFPQFS(+79.97)YSASG	48.46	1306.5	11	-34.8	654.236	2	26.89	1	11	Phosphorylation (STY)
PS8	G.PQS(+79.97)PGSPPFR	38.24	1148.5	10	32.8	575.277	2	22.37	4	13	Phosphorylation (STY)
PS8	P.GPQS(+79.97)PGSPPFR	58.12	1205.52	11	-34.4	603.748	2	19.76	3	13	Phosphorylation (STY)
PS8	RPGPQSPGS(+79.97)PPFR	43.08	1458.68	13	-40.3	487.213	3	17.87	1	13	Phosphorylation (STY)
PS8	RPGPQS(+79.97)PGSPPFR	62.43	1458.68	13	-33.2	487.217	3	17.61	1	13	Phosphorylation (STY)
PS9	T.PS(+79.97)GEAPPFR	40	1036.44	9	-19.3	519.216	2	31.08	5	13	Phosphorylation (STY)
PS9	L.T(+79.97)PS(+79.97)GEAPPFR	35.03	1217.45	10	44.2	609.76	2	33.46	4	13	Phosphorylation (STY)
PS9	EPLT(+79.97)PS(+79.97)GEAPP.F	30.97	1253.46	11	47.5	627.768	2	19.15	1	11	Phosphorylation (STY)
PS9	P.LTPS(+79.97)GEAPPFR	46.69	1250.57	11	-40.3	626.267	2	22.82	3	13	Phosphorylation (STY)
PS9	P.LT(+79.97)PSGEAPPFR	81.85	1250.57	11	-27.8	626.275	2	22.73	3	13	Phosphorylation (STY)
PS9	E.PLT(+79.97)PSGEAPPFR	78.42	1347.62	12	-28.5	674.799	2	24.29	2	13	Phosphorylation (STY)
PS9	EPLTPS(+79.97)GEAPPFR	44.29	1476.66	13	-34.7	739.314	2	25.95	1	13	Phosphorylation (STY)
PS9	EPLT(+79.97)PSGEAPPFR	82.99	1476.66	13	-26.4	739.32	2	25.12	1	13	Phosphorylation (STY)
The nanoLC-MS/MS spectra were analyzed with the PEAKS studio proteomics software X. The sequence of peptide substrates (33 sequences) was created as database for searching against. Peptide identifications using search engine PEAKS DB combined with PEAKS de novo sequencing. Search parameters were performed with, variable modification of oxidation (M) and phosphorylation (S,T,Y), 3 of max variable …
